# Supplementary material for: Roof Dust Accumulation Characteristics and the Influencing Factors in Typical Urban Areas of Beijing
Source: Research Square preprint supplement (doi:10.21203/rs.3.rs-7231294/v1), 2025-10-01
Supplement: Supplementary file 1 [file 12e34d07fbbf7fe2edfd8c77.xlsx]

## Sheet: Sheet1
	9 Be [ No Gas ]	23 Na [ He ]	24 Mg [ No Gas ]	27 Al [ No Gas ]	39 K [ He ]	43 Ca [ He ]	45 Sc [ No Gas ]	47 Ti [ No Gas ]	31 -> 47 P [ O2 ]	48 Ti [ No Gas ]	32 -> 48 S [ O2 ]	51 V [ He ]	52 Cr [ He ]	55 Mn [ No Gas ]	56 Fe [ He ]	57 Fe [ He ]	59 Co [ He ]	60 Ni [ He ]	63 Cu [ He ]	47 -> 63 Ti [ O2 ]	48 -> 64 Ti [ O2 ]	66 Zn [ He ]	75 As [ He ]	78 Se [ He ]	89 Y [ No Gas ]	90 Zr [ No Gas ]	95 Mo [ No Gas ]	107 Ag [ No Gas ]	111 Cd [ No Gas ]	123 Sb [ No Gas ]	137 Ba [ No Gas ]	121 -> 137 Sb [ O2 ]	139 La [ No Gas ]	140 Ce [ No Gas ]	141 Pr [ No Gas ]	146 Nd [ No Gas ]	147 Sm [ No Gas ]	153 Eu [ No Gas ]	157 Gd [ No Gas ]	159 Tb [ No Gas ]	163 Dy [ No Gas ]	165 Ho [ No Gas ]	166 Er [ No Gas ]	169 Tm [ No Gas ]	172 Yb [ No Gas ]	175 Lu [ No Gas ]	205 Tl [ No Gas ]	208 Pb [ No Gas ]	232 Th [ No Gas ]
	浓度 [ ppb ]	浓度 [ ppb ]	浓度 [ ppb ]	浓度 [ ppb ]	浓度 [ ppb ]	浓度 [ ppb ]	浓度 [ ppb ]	浓度 [ ppb ]	浓度 [ ppb ]	浓度 [ ppb ]	浓度 [ ppb ]	浓度 [ ppb ]	浓度 [ ppb ]	浓度 [ ppb ]	浓度 [ ppb ]	浓度 [ ppb ]	浓度 [ ppb ]	浓度 [ ppb ]	浓度 [ ppb ]	浓度 [ ppb ]	浓度 [ ppb ]	浓度 [ ppb ]	浓度 [ ppb ]	浓度 [ ppb ]	浓度 [ ppb ]	浓度 [ ppb ]	浓度 [ ppb ]	浓度 [ ppb ]	浓度 [ ppb ]	浓度 [ ppb ]	浓度 [ ppb ]	浓度 [ ppb ]	浓度 [ ppb ]	浓度 [ ppb ]	浓度 [ ppb ]	浓度 [ ppb ]	浓度 [ ppb ]	浓度 [ ppb ]	浓度 [ ppb ]	浓度 [ ppb ]	浓度 [ ppb ]	浓度 [ ppb ]	浓度 [ ppb ]	浓度 [ ppb ]	浓度 [ ppb ]	浓度 [ ppb ]	浓度 [ ppb ]	浓度 [ ppb ]	浓度 [ ppb ]
DJ-1	123.297	1.97339e+06	1.20018e+06	2.30497e+08	1.05269e+06	2.8457e+06	836.444	230471	151706	249502	1.69577e+06	5418.41	47735.5	81499.4	2.57052e+06	2.86504e+06	1557.47	23796	11058.8	445431	430648	97758.3	942.103	644.428	1107.86	6060.19	2294.27	49698.7	57.9305	795.038	67725.2	1307.91	2646.8	6562.9	630.804	2405.35	407.875	83.9828	299.306	38.1311	215.473	41.711	123.814	17.7381	105.331	17.0167	32.059	30392.9	504.276
DJ-2	1210.79	1.86192e+07	9.53084e+06	1.87227e+09	1.02361e+07	3.16731e+07	6985.1	2.46807e+06	1.96702e+06	2.63762e+06	1.22584e+07	54539.9	226947	586714	2.71883e+07	2.97857e+07	13004	118709	100202	5.56301e+06	5.29739e+06	652365	13855.2	4378.42	9227.59	58344.7	13874.5	208867	606.497	3502.74	697094	7597.27	18321.3	53353.6	5060.34	19616.1	3518.38	768.375	2797.64	386.196	2143.83	404.398	1193.31	166.037	1068.36	165.499	344.788	146814	4043.2
DJ-3	117.555	1.58465e+06	1.23191e+06	2.78604e+08	991068	2.59125e+06	915.951	241137	146600	255697	930756	5908.31	138612	63780.9	2.94235e+06	3.25144e+06	2683.02	74469.1	14430.3	542972	499587	100698	1168.66	558.4	1099.96	5653.58	3928.49	50156.6	87.1949	496.713	52112.7	1187.84	2455.77	5508.86	615.828	2334.89	410.605	88.9439	335.644	46.5238	257.981	52.3205	142.43	19.3757	122.122	19.4048	39.2802	24278.3	607.362
DJ-4	133.084	2.77962e+06	1.2108e+06	2.86706e+08	890465	2.96594e+06	1019.42	266530	150338	284292	2.52049e+06	5418.84	39766.8	73155.8	2.37084e+06	2.58685e+06	1413.33	19846.5	9112.81	496779	470633	41655.6	1217.52	687.743	1187.43	6266.73	1482.88	35671.6	100.676	427.89	59500.3	812.438	2857.51	7210.85	744.863	2805.38	465.328	99.9241	368.197	49.7324	267.557	51.4481	146.056	21.8791	139.747	20.79	43.7308	13773.5	628.155
DJ-5	1323.51	1.44309e+07	9.94241e+06	1.68186e+09	8.88418e+06	2.84751e+07	5562.33	2.39891e+06	1.54543e+06	2.57591e+06	9.91521e+06	51841	88793.9	676899	2.18532e+07	2.36392e+07	9907.84	45947.7	78952.7	4.29996e+06	4.02411e+06	321355	11980	4505.16	5866.36	52928.5	6731.33	152522	690.701	2281.64	579840	3680.1	17116.7	44493.2	5166.77	20283.7	3521.85	753.975	2605.12	365.747	2113.39	404.582	1132.75	156.089	1024	155.698	446.668	114127	1593.38
DJ-6	133.133	1.38257e+06	1.20239e+06	3.03046e+08	972678	2.95593e+06	1025.28	269647	130810	287775	680364	5278.93	26768.4	70499.6	2.50281e+06	2.82052e+06	1169.31	12732.5	6576.28	439141	418930	28240.9	938.528	397.862	1260.16	5991.28	923.251	28349.3	56.5263	149.056	55658.8	293.804	2670.89	6310.2	685.231	2655.8	460.337	96.8717	346.673	46.7414	255.256	49.8878	145.964	21.0472	140.529	19.9851	45.6752	10002.7	654.477
DJ-7	1424.17	1.74123e+07	8.59719e+06	1.81946e+09	9.77175e+06	3.26013e+07	7186.68	2.82969e+06	1.64306e+06	3.06527e+06	1.00093e+07	57356.4	289132	772465	2.64937e+07	2.91281e+07	13071.6	142253	112856	5.21169e+06	5.06369e+06	582454	14142.1	4034.9	8551.76	80524.9	15219.1	181580	874.148	7906.37	624620	11234.4	16897.1	41322.7	5041.76	19966.2	3626.73	801.716	2803.28	404.996	2294.9	436.772	1295.37	181.675	1231.88	172.126	457.157	151030	3505.72
DJ-8	1422.42	2.5084e+07	1.48681e+07	3.16584e+09	9.72469e+06	3.44822e+07	10484.7	2.90229e+06	1.72678e+06	3.16764e+06	2.11202e+07	56227.9	357127	795281	2.4338e+07	2.70425e+07	13899.8	176975	87194.3	4.51381e+06	4.37835e+06	428466	15438.2	6057.79	11462.5	69430.1	24584.3	121583	975.053	4227.13	613802	5649.36	26268.9	74360.8	7160.25	27488.3	4415.51	987.13	3630.95	481.246	2651.63	518.778	1420.93	211.896	1337.01	201.436	502.438	84033.5	5535.65
DJ-9	1392.32	2.09737e+07	9.97966e+06	2.01475e+09	1.2254e+07	3.94629e+07	7664.4	2.9205e+06	1.48742e+06	3.10541e+06	1.89618e+07	62335	244879	802011	2.70393e+07	2.94772e+07	13929.9	124805	100479	4.48453e+06	4.18671e+06	550515	13812.6	5672.21	9236.83	61633	11392.6	229744	1143.68	12820.2	636972	14553.2	29316.5	69077.6	7544.06	27989.1	4457.63	944.183	3421.06	457.698	2492.2	474.533	1338.68	185.396	1226.11	182.537	557.219	106821	4618.61
DJ-10	1614.19	1.68756e+07	1.0506e+07	2.42512e+09	1.21104e+07	3.65312e+07	8534.39	2.98945e+06	1.50504e+06	3.16039e+06	1.37388e+07	63046.3	305921	816441	2.7714e+07	2.9583e+07	13906.5	149354	83325.4	4.90629e+06	4.61047e+06	421610	13174.7	6733.69	10351.6	61066.9	11347.8	240104	843.415	3559.3	612049	7398.05	28622.5	62042.1	7234.87	27228.9	4446.39	945.642	3282.15	439.937	2444.68	465.479	1377	181.599	1201.78	168.927	550.01	107027	4653.35
DJ-11	1336.52	3.04209e+07	1.05711e+07	2.01644e+09	1.11157e+07	5.09724e+07	7130.36	2.72094e+06	3.46469e+06	2.89535e+06	2.09656e+07	59088.4	176675	775181	2.51626e+07	2.73771e+07	12124.6	89703.1	83232.9	4.40475e+06	4.15717e+06	338046	12893.7	7270.76	9951.95	59412.1	8510.58	105398	1139.7	4029.87	550902	5575.42	26766.5	64512.3	6848.1	25887	4246.17	902.489	3486.21	444.07	2445.62	476.594	1302.69	181.416	1288.86	176.837	431.893	59023.7	4243.02
DJ-12	1706.38	1.37327e+07	1.1808e+07	2.87961e+09	1.21163e+07	3.8173e+07	9682.39	3.19124e+06	1.44259e+06	3.50522e+06	6.97479e+06	67036	151668	793901	2.86627e+07	3.10137e+07	12765.6	75197.8	95451	5.13079e+06	4.87528e+06	321564	12547.4	5184.12	9960	69006	6241.45	68193	865.268	3818.55	665938	4990.9	20423.8	48821.3	5981.97	23810.8	4019.74	907.128	3379.73	450.212	2578.41	490.731	1380.18	196.447	1395.06	185.286	495.319	94918.4	5134.32
DJ-13	1540.18	2.053e+07	1.29239e+07	2.98012e+09	1.21152e+07	3.67369e+07	8977.72	3.00812e+06	1.36462e+06	3.21222e+06	1.21711e+07	54699.6	246818	778039	2.32702e+07	2.57876e+07	11669.3	126561	69008.4	3.97488e+06	3.79466e+06	375717	10694.3	5424.52	10823.5	60512.7	11138.7	55085.4	702.185	1793.02	615652	2376.69	22943.4	55132.8	6264.34	23698.8	4100.29	906.076	3257.25	440.212	2519.02	460.4	1322.27	184.415	1252.32	183.863	414.634	59036.3	4733.81
DJ-14	1815.57	9.62218e+06	7.17126e+06	1.97033e+09	1.0796e+07	3.24888e+07	6395.32	3.12466e+06	1.63973e+06	3.33937e+06	8.68976e+06	61704.8	64022.9	799399	2.46635e+07	2.65628e+07	10305.4	33763.3	48031.5	4.19001e+06	4.10279e+06	228715	12506.6	4276.2	6708.53	68723.2	4611.67	43920.9	797.436	3313.36	521625	3809.59	9724.62	25146.6	3240.78	13344.6	2710.03	606.964	2375.13	349.755	2076.27	416.906	1288.02	166.397	1155.62	166.969	522.546	61432.8	2829.63
DJ-15	2094.22	1.0284e+07	9.09194e+06	2.57688e+09	1.14791e+07	2.97009e+07	9519.7	3.64485e+06	1.60856e+06	3.89921e+06	8.91476e+06	65645.9	71248.3	922549	2.67198e+07	2.95979e+07	11332.5	37360.9	52453.4	4.45911e+06	4.34254e+06	259126	13916.3	4438.66	7871.14	79371.9	4985.26	53823.5	1090.25	3402.48	549689	3356.38	10359.7	27280.9	3536.34	14380.3	2964.52	657.167	2522.62	378.79	2279.05	446.546	1313.46	183.267	1225.81	186.486	599.199	65477.5	3516.09
DJ-16	1355.49	1.08212e+07	1.02639e+07	3.00811e+09	2.4903e+07	2.16948e+07	8859.92	2.38702e+06	6.14425e+06	2.54964e+06	8.39612e+06	41140.1	68765	514736	1.64607e+07	1.81523e+07	7400.37	37223.4	36474.3	2.95052e+06	2.92193e+06	163846	8373.39	4210.82	7792.77	51561	3092.44	55699.2	587.459	3780.79	386449	3761.33	13414.7	37956.7	3818.61	15009.3	2999.58	638.894	2591.76	358.231	2089.14	396.003	1167.18	160.62	1014	145.467	386.906	40742.1	4214.07
DJ-17	1869.76	1.47733e+07	1.09826e+07	3.02272e+09	1.42063e+07	3.84578e+07	9523.42	3.16013e+06	1.89396e+06	3.35534e+06	1.10606e+07	70541.9	86197.2	818636	2.82189e+07	3.12408e+07	13043.8	43624.1	65921.2	4.46443e+06	4.30566e+06	288109	14768.8	5714.67	8740.01	68619.9	5021.32	35603.4	934.349	5675.42	577473	6912.59	13134.4	36259.2	4174.79	16730.7	3363.16	743.225	2959.6	431.729	2506.11	484.114	1386.05	191.479	1266.91	181.146	515.241	60443	4433.78
DJ-18	1948.47	1.36994e+07	1.46555e+07	3.99669e+09	1.50756e+07	3.51892e+07	11577.3	3.2653e+06	2.11514e+06	3.45408e+06	9.45117e+06	67072.8	66424.6	796097	2.84747e+07	3.08396e+07	11705.2	38027.1	51841.4	4.70652e+06	4.48973e+06	293609	13220.5	5927.55	10386.3	60376.4	4946.77	44395.3	687.298	3795.46	610178	4482.07	17490.6	44033.1	5012.7	19770.2	3788.86	840.584	3271.97	450.33	2549.5	487.386	1404.16	192.468	1251.23	187.164	536.932	53705.4	5552.98
DJ-19	1972.58	1.46627e+07	1.29968e+07	3.74645e+09	1.44196e+07	3.39366e+07	11688.4	3.0069e+06	1.95191e+06	3.37119e+06	9.81452e+06	67471.3	72363.2	808459	2.82594e+07	3.07192e+07	11665.1	37839.1	55249	3.91476e+06	3.86691e+06	385801	15162.6	5786.48	10578.6	65735.7	5218.48	33920.3	875.634	3544.53	551200	4021.92	16891.1	44625.1	4899.89	19701.7	3757.33	843.287	3346.58	475.986	2707.46	510.062	1505.69	206.191	1303.35	194.196	532.534	57219.7	5899.9
DJ-20	2143.3	1.06127e+07	9.64025e+06	2.89804e+09	1.23366e+07	2.93403e+07	9296.08	3.21787e+06	1.45732e+06	3.50841e+06	6.06429e+06	64861.6	58696.6	828283	2.63652e+07	2.89527e+07	11163.6	30940.2	43065.9	3.95089e+06	3.76435e+06	222493	12618.8	4036.73	7114.2	72089.6	2889.18	35587	805.036	2929.33	549947	2598.18	10422.3	27070.5	3398.39	14203.4	2900.5	653.924	2472.8	363.536	2159.59	401.563	1204.63	173.152	1112.23	167.289	567.779	56250.4	3525.39
DJ-21	1922.57	1.13757e+07	1.22422e+07	3.72313e+09	1.33617e+07	3.31828e+07	11638.9	2.95066e+06	1.46528e+06	3.20284e+06	8.79467e+06	63084	72671.2	805389	2.53684e+07	2.75159e+07	10582.8	36823.7	42605.4	3.63438e+06	3.59716e+06	239551	32278.8	6012.88	10600.5	64095.3	5891.77	24195.5	784.406	4743.42	525440	4306.54	16823.3	42569.3	4752.48	19112.6	3644.52	795.633	3266.64	453.708	2608.82	487.991	1413.41	203.585	1303.84	192.738	533.843	82793.4	5894.9
DJ-22	1726.07	8.16935e+06	4.73225e+06	1.4268e+09	1.0248e+07	2.49014e+07	5447.41	2.84956e+06	1.52572e+06	3.05422e+06	1.99653e+06	56268.7	55683.2	715260	2.34311e+07	2.55296e+07	9468.19	28838.4	36438.1	3.48811e+06	3.41973e+06	184089	10286.5	2295.52	3981.42	57297.1	1662.66	20609	668.372	238.992	470400	311.24	6233.74	16626.3	2161.99	9010.86	1809.67	404.078	1467.89	223.566	1325.09	274.724	772.936	112.512	712.193	108.655	490.077	48169.1	1368.25
DJ-23	1710.26	1.28436e+07	9.77586e+06	3.05191e+09	1.41996e+07	3.3294e+07	9453.13	3.01854e+06	1.12067e+06	3.21574e+06	2.02196e+06	63396.6	54270.6	669352	2.54488e+07	2.75024e+07	9883.01	26998.1	24296.7	4.3504e+06	4.22958e+06	101202	8874.56	3152.48	6165.81	50683.1	1402.73	12786.1	286.057	222.117	567624	934.164	9863.61	23674.6	2921.45	11693.9	2291.32	559.425	1966.17	293.351	1682.21	330.225	974.332	137.554	909.561	134.161	380.703	30478	2964.17
DJ-24	1990.64	1.81762e+07	1.04147e+07	2.82992e+09	1.46271e+07	3.65678e+07	9748.05	3.09235e+06	1.88681e+06	3.27231e+06	1.0424e+07	72375.9	69253.8	830859	2.97599e+07	3.25992e+07	12035.7	35944.7	50278	4.37844e+06	4.27662e+06	372638	13664.7	6221.76	7654.25	64866	3524.39	17559.9	893.037	3819.65	536869	4032.35	12482.2	41731.5	3879.91	15870.2	3113.74	687.384	2649.62	388.48	2231.39	439.219	1249.12	181.01	1136.45	170.76	537.185	54776.4	3699.33
DJ-25	2032.01	1.36512e+07	1.16648e+07	3.12773e+09	1.17919e+07	3.47812e+07	9747.08	3.08098e+06	1.33165e+06	3.32644e+06	7.26409e+06	56017.6	51602.8	791426	2.28523e+07	2.5107e+07	8933.68	24848.7	35916.3	3.52204e+06	3.44382e+06	217920	10164.9	4413.23	8061.87	66966.3	2441.77	20052.6	618.858	3193.6	534619	2759.58	12460.5	39824.8	3871.37	15696.7	3115.69	710.156	2560.26	386.668	2155.48	436.237	1276.55	178.625	1171	172.514	488.188	46533.8	3674.72
DJ-26	2062.49	1.5947e+07	1.05065e+07	2.89451e+09	1.19249e+07	3.30295e+07	9520.3	3.26938e+06	1.38638e+06	3.53545e+06	9.97679e+06	61570.2	60006.2	780575	2.50076e+07	2.71315e+07	10165.6	31661.5	44186.7	3.90033e+06	3.74859e+06	268598	11494.7	5634.68	7430.2	67386.4	3809.2	20779.2	786.465	3498.27	527061	3022.84	11127.9	36812.5	3643.72	15470.8	3104.35	666.305	2549.83	386.357	2153.02	418.787	1245.51	180.674	1109.25	168.285	533.557	53348.4	3598.21
DJ-27	1759.97	1.58831e+07	1.18519e+07	3.50443e+09	1.46646e+07	3.38239e+07	9882.75	2.58766e+06	2.03059e+06	2.83991e+06	9.09647e+06	59509	59348.9	677537	2.47399e+07	2.72756e+07	9974.5	32039.8	42579.3	3.80124e+06	3.58082e+06	226791	12201.1	4757.36	8840.34	55142.8	2267.36	13015.1	635.257	3495.08	492968	3745.28	14301.7	44453.9	4193.64	16724.1	3388.66	732.333	2904.52	406.778	2330.17	451.527	1328.11	187.35	1231.2	175.881	470.785	44234.3	4884.53
DJ-28	1740.76	1.72862e+07	1.38709e+07	3.21977e+09	1.35763e+07	4.68669e+07	10241.6	3.0464e+06	1.44675e+06	3.29694e+06	1.17272e+07	68187.7	164686	750509	2.65361e+07	2.84603e+07	11710.7	77999.1	72397.9	3.99141e+06	3.86074e+06	691908	12362.6	6915.97	10104.4	57272.3	6393.33	17746.3	976.899	2177.19	650047	2415.13	22809.3	58659.6	6314.53	24503.6	4301.39	957.378	3493.31	460.063	2645.42	461.898	1383.24	184.234	1223.73	184.328	513.228	65937.6	5305.23
DJ-29	1907.87	1.7598e+07	1.54293e+07	3.46448e+09	1.25518e+07	3.54207e+07	10777.5	3.07648e+06	1.50828e+06	3.40194e+06	1.45573e+07	61821.9	194894	870926	2.62985e+07	2.85693e+07	11452.8	82085.4	90329.5	3.82482e+06	3.73431e+06	399323	13451.5	6278.19	10567.6	67624.7	8279.83	21585.3	1264.28	4509.86	635644	4195.26	24377.5	70011.4	6526.7	25077.9	4335.24	991.596	3561.23	473.608	2583.56	482.177	1427.91	197.714	1246.88	178.972	528.238	76267.4	5668.66
DJ-30	1792.1	1.91026e+07	1.16844e+07	2.33644e+09	1.2531e+07	4.68551e+07	7879.77	2.88911e+06	1.461e+06	3.17739e+06	1.42493e+07	66850.3	148112	768976	2.63445e+07	2.95015e+07	11732.8	72129.9	108051	3.85962e+06	3.67125e+06	641158	13359.7	5914.86	8765.46	59072.1	6850.85	16938	1101.95	3309.45	645080	3410.25	21027.4	57175.6	6001.7	23921.6	3981.82	875.781	3145.56	430.609	2430.01	450.737	1286.25	179.525	1072.44	162.699	561.984	69070.2	3931.64
DJ-31	1779.8	1.53495e+07	1.56434e+07	3.37882e+09	1.22028e+07	3.99066e+07	10258.8	3.04317e+06	1.35588e+06	3.22058e+06	1.26792e+07	60780.3	135874	794471	2.51427e+07	2.73329e+07	10732	68676	88539.5	3.8189e+06	3.63077e+06	464897	12004.4	6703.42	11054	57139.6	9200.32	7163.08	1210.69	4782.01	687661	4050.14	30725.6	70326.9	7426.19	29144.5	4897.97	1068.69	3902.43	525.609	2781.41	523.693	1475.2	206.685	1303.93	201.22	529.535	71412.6	5784.39
DJ-32	1395.97	1.20374e+07	9.12835e+06	2.10675e+09	1.07325e+07	3.62027e+07	6552.9	2.7514e+06	1.06286e+06	2.95556e+06	2.62961e+06	46780.2	45761	565467	1.80501e+07	1.999e+07	8734.67	25222.6	42287.3	3.67346e+06	3.51909e+06	160679	6440.11	3047.44	5917.23	57451.2	2693.19	6972.75	337.517	2513.79	567481	2456.42	12339.8	32509.5	3833.63	15681.8	2794.44	617.572	2329.69	328.684	1872.49	360.257	1038.27	146.03	920.459	134.635	350.335	34306.9	2988.85
DJ-33	2041.19	1.50944e+07	1.20632e+07	3.60347e+09	1.41624e+07	3.78729e+07	8935.87	2.92805e+06	1.39842e+06	3.16494e+06	6.90445e+06	67880.6	67535.2	818610	2.74456e+07	2.97924e+07	11159.2	35124.7	36009.4	3.43533e+06	3.31928e+06	212259	12549.9	6326.76	8848.36	61081	2765.25	-12839.1	638.141	5064.16	544461	4464.37	13946.6	47057.6	4307.73	17578.6	3408.84	757.312	2913.01	400.633	2351.37	464.064	1295.41	181.486	1162.31	172.003	657.154	45350.7	4911.71
DJ-34	1926.84	1.7257e+07	1.38747e+07	4.12433e+09	1.47924e+07	3.72875e+07	12722.6	3.14097e+06	1.58954e+06	3.34539e+06	9.33047e+06	69808.4	61014.4	757080	2.75917e+07	3.06295e+07	11702.1	32824.3	43610	4.63087e+06	4.50242e+06	198280	13378.8	6933.7	10120.6	62686.3	2380.2	11030.7	656	2917.6	516662	3558.65	16356.1	51418.7	4790.99	19117.1	3749.44	828.741	3228.35	455.286	2641.34	517.266	1507.08	216.168	1316.41	205.944	469.137	43473.1	6035.24
DJ-35	1959.45	1.47612e+07	1.07016e+07	3.13304e+09	1.41802e+07	3.77368e+07	9906.29	3.09499e+06	1.96082e+06	3.34052e+06	7.51303e+06	69304.9	61065.1	763866	2.80521e+07	3.07449e+07	11407.5	31866.7	37602.2	4.42007e+06	4.24167e+06	279313	13380	6186.33	8523.86	59792.3	2147.86	5245.15	718.668	2040.15	481747	2471.58	12487.2	41126.4	4032.31	16777.1	3312.04	734.81	2930.26	423.342	2444.86	478.389	1349.13	196.834	1259.1	189.449	486.986	45346.4	4678.65
DJ-36	1916.6	1.71899e+07	1.56293e+07	4.74373e+09	1.54522e+07	4.07485e+07	11646.3	2.44218e+06	1.62377e+06	2.63764e+06	9.36765e+06	70954.4	65960.6	730796	2.86281e+07	3.12083e+07	11650.5	34072.9	40456	3.92706e+06	3.73326e+06	195987	13296.7	9109.59	13729.8	49714.3	2654.38	2325.73	651.089	1098.35	513838	1702.45	29143.8	73040.6	6657.29	25777.5	4792.48	1032.62	4128.34	580.512	3171	563.78	1617.92	228.056	1453.82	213.074	505.32	42252.5	6294.59
DJ-37	1378.06	1.3292e+07	8.6809e+06	2.40074e+09	1.26628e+07	3.97859e+07	7230.6	3.04212e+06	1.07526e+06	3.28964e+06	1.96848e+06	62853.4	66553.9	564607	2.44575e+07	2.69716e+07	7725.87	19871	36620.9	4.41853e+06	4.22396e+06	461054	12718.6	2904.92	4723.5	46369.4	1703.85	4272.77	438.839	1508.02	607215	1906.08	8060.86	20747.1	2626.54	10740.9	2106.07	539.253	1760.29	251.588	1498.65	293.78	865.336	119.372	774.856	117.431	326.644	37958.2	1911.44
DJ-38GSS	1380.8	1.5036e+07	2.84949e+06	5.26228e+09	1.9162e+07	9.75016e+06	9015.29	1.70719e+06	313820	1.72371e+06	130824	24446.6	16788.1	288074	1.02781e+07	1.02051e+07	3776.96	8749.29	8532.17	2.16119e+06	2.02512e+06	23167.2	3702.04	2057.42	4210.23	22735.5	未检出	-596.779	61.1039	3755.11	1.17068e+06	3700.63	7773.31	19242.3	2400.78	9261.41	1838.46	478.003	1614.22	235.532	1640.1	262.735	753.855	115.513	710.827	110.808	408.412	27020.1	2321.97
DJ-39空白	0	0	0	0	0	0	0	0	0	0	0	0	0	0	0	0	0	0	0	0	0	0	0	0	0	0	未检出	0	0	0	0	0	0	未检出	0	0	0	0	0	0	0	0	0	0	0	0	0	0	0
DJ-40空白	0	0	0	0	0	0	0	0	0	0	0	0	0	0	0	0	0	0	0	0	0	0	0	0	0	0	未检出	0	#REF!	0	0	0	0	未检出	0	0	#REF!	0	0	0	#REF!	0	0	#REF!	0	#REF!	0	0	0
DJ-41	2153.87	1.0153e+07	5.67854e+06	1.36652e+09	1.16054e+07	3.81554e+07	6040.12	3.71091e+06	1.4985e+06	4.02303e+06	2.25156e+06	76283.3	68573.7	814213	3.16929e+07	3.45377e+07	12204.9	33355.6	56611.1	4.84777e+06	4.68625e+06	201693	12517.6	3638.61	5608.3	82555.8	2693.24	11243.2	717.05	3810.43	567456	3828.08	9167.15	24836.4	3221.24	13438.7	2682.53	608.457	2234.39	351.911	2056.24	450.341	1191.05	174.424	1100.12	158.854	438.404	51993	1572.52
DJ-42	1950.47	9.48493e+06	6.9671e+06	1.77589e+09	1.10766e+07	3.3718e+07	6818.12	3.48554e+06	1.37864e+06	3.77122e+06	2.62122e+06	74506.6	67210	726204	3.19209e+07	3.45062e+07	12335	33063.3	49164.6	4.86202e+06	4.6068e+06	196992	13150.2	3804.24	6028.63	73101.9	2617.34	9354.81	733.99	1562.69	552606	1863.48	9288.19	25245	3358.11	14057.2	2813.45	636.378	2393.58	372.208	2179	449.173	1257.61	172	1143.78	168.315	502.066	57045.7	2466.86
DJ-43	1473.2	8.082e+06	5.49799e+06	1.31375e+09	1.15517e+07	2.94807e+07	4647.8	2.41374e+06	2.00487e+06	2.63814e+06	2.0267e+06	49196.9	42283.5	495024	2.15025e+07	2.33121e+07	8339	20367.8	29710.9	3.08893e+06	2.90717e+06	157602	6700.6	3543.66	4367.73	53459.6	1234.43	9897.3	589.369	1780.21	404800	2010.84	7570.39	19701.8	2617.95	10692.2	2137.48	474.131	1779.71	261.793	1534.57	304.428	863.602	124.955	844.183	127.991	339.783	37471.2	1668.97
DJ-44	1840.12	1.00848e+07	6.55448e+06	1.5745e+09	1.11272e+07	3.61942e+07	6336.66	3.50287e+06	1.41913e+06	3.69876e+06	2.39596e+06	69511	62446.9	747091	2.88654e+07	3.14819e+07	11125.1	31608.4	49559.7	4.83125e+06	4.66399e+06	173069	11566.8	3965.79	6068.75	72586.5	2671.66	6585.07	614.565	3512.74	547163	3745.32	9504.54	24632.4	3148.42	12895.9	2546.34	580.548	2262.14	383.466	2020.63	393.958	1171.05	167.606	1148.28	163.215	436.416	46054.6	2061.98
DJ-45	2053.8	9.68125e+06	6.21662e+06	1.42768e+09	1.10374e+07	3.38732e+07	6395.86	3.92858e+06	1.44894e+06	4.14726e+06	2.809e+06	71741.3	63892.4	784049	2.99536e+07	3.25156e+07	11430.1	30893.8	52819.2	5.27244e+06	5.06102e+06	236002	13050.2	3619.33	5867.16	80414.5	3030.75	9613.4	818.262	3521.95	599725	3412.92	9007.11	25490.7	3352.03	13768.1	2825.84	621.918	2360.61	364.659	2204.46	425.761	1294.24	186.664	1196.13	167.715	511.782	61130.7	1990.14
DJ-46	2004.89	1.05571e+07	6.17007e+06	1.46314e+09	1.1278e+07	3.7727e+07	6870.42	3.60959e+06	1.44619e+06	3.89375e+06	2.90735e+06	72842.2	64296.2	771732	3.03613e+07	3.24786e+07	11971	32131.2	43798.1	5.18761e+06	4.85617e+06	181153	12688.8	4011.68	5801.07	72433.1	2076.95	9400.43	585.748	1308.55	541322	1745.65	8296.41	22560.5	3019.22	12799.2	2576.7	587.309	2200.26	343.42	2063.1	416.273	1193.68	172.527	1134.78	162.988	484.673	47469.7	2126.96
DJ-47	1991.57	1.09874e+07	8.07825e+06	2.08746e+09	1.23633e+07	3.66363e+07	7837.72	3.70785e+06	1.39806e+06	3.98768e+06	2.3821e+06	76187.3	65810.2	786094	3.15324e+07	3.42539e+07	12503.6	35075.4	52817.5	5.13791e+06	4.97293e+06	186815	12642	4373.85	6487.78	72213.9	2033.29	11690.1	582.18	1418.12	540532	1936.66	10410.3	27976.2	3687.59	15287.9	3113.86	683.967	2522.75	395.006	2332.87	460.942	1322.61	186.898	1204.31	181.081	464.337	46904.4	2551.11
DJ-48	1991.71	1.03158e+07	5.55699e+06	1.45542e+09	1.16025e+07	3.66118e+07	6759.68	3.6826e+06	1.39658e+06	3.98762e+06	2.66946e+06	76287.6	66218.6	787656	3.2056e+07	3.54287e+07	12427.9	32193.2	42712.1	5.14559e+06	4.89552e+06	169517	12748.3	4199.84	5269.29	71455.9	1916.39	8772.27	515.691	2391.99	505437	2756.53	7797.33	20997.4	2741.95	11428.7	2364.92	508.999	1927.75	299.309	1840.28	381.357	1096.09	165.769	1111.69	159.378	463.244	41265.3	1641.17
DJ-49	1973.27	9.95505e+06	4.65262e+06	1.23309e+09	1.08644e+07	3.38307e+07	5399.85	3.63122e+06	1.46544e+06	3.93958e+06	2.42111e+06	70230.5	61089.9	792420	2.88712e+07	3.16113e+07	11353.8	30575.3	45140	4.76812e+06	4.5427e+06	163770	11840	3078.36	4672.37	69035.3	2230.23	4441.76	676.402	2232.1	521464	2385.51	7109.08	19353.9	2535.44	10600.7	2105.34	485.239	1748.57	282.435	1692.1	347.428	1033.67	147.055	996.336	142.213	472.728	45318.1	1362.21
DJ-50	1338.14	1.40614e+07	9.92917e+06	3.16371e+09	1.54863e+07	3.2062e+07	7296.79	1.97783e+06	523974	2.13315e+06	729886	37392.5	30561.5	480497	1.53384e+07	1.68145e+07	5426.8	11866.2	13104.8	2.51868e+06	2.37322e+06	64286.1	4574.52	2895.57	4673.94	37799.2	595.572	5139.11	202.07	249.334	727320	471.757	8342.82	20510.6	2609.88	10610.1	1983.62	567.688	1693.67	225.57	1280.6	240.882	713.643	99.7381	751.695	90.7941	321.953	23821.8	2383.95
DJ-51	1945.67	9.73755e+06	5.74163e+06	1.33509e+09	1.20957e+07	3.34533e+07	5240.82	3.31776e+06	1.61761e+06	3.44929e+06	2.55379e+06	71864.8	60882	712922	2.99732e+07	3.2498e+07	11743.8	32071.8	46158.1	5.12587e+06	4.74296e+06	199902	12250.7	3856.63	4773.4	65893.1	2231.49	5008.67	741.152	3251.53	523180	3952.31	9339.53	24819.5	3201.01	13101	2518.91	558.386	2078.9	311.405	1805.83	347.41	993.383	160.845	942.488	202.395	492.944	52997.3	1283.22
DJ-52	1960.44	1.01061e+07	5.39677e+06	1.44464e+09	1.14909e+07	3.55621e+07	5794.74	3.48833e+06	1.49743e+06	3.84348e+06	2.09654e+06	71221	59233.5	775444	2.89437e+07	3.19293e+07	11452.9	30102	39121.2	5.01856e+06	4.84344e+06	164696	12114.5	3229.37	5020.1	63635.2	1911.05	4503.25	598.083	1653.13	510907	2380.2	8281.69	22322.1	2882.62	11741	2361.4	519.047	1938.04	293.227	1838.7	368.457	1071.72	156.637	1025.26	148.749	459.692	44677.2	1334.85
DJ-53	1951.94	1.00482e+07	4.88172e+06	1.45982e+09	1.18146e+07	3.72323e+07	5122.38	3.54732e+06	1.36115e+06	3.78385e+06	2.58393e+06	72346.5	62092.5	743905	3.04646e+07	3.38751e+07	11847.5	31823.8	43870.8	4.78329e+06	4.49744e+06	186249	12401.7	3575.3	4975.36	69561.8	2048.35	2378.8	599.956	3055.41	518879	3066.53	8821.65	23571.1	3067.9	12808.7	2545.72	563.484	2071.23	331.345	1855.64	369.47	1072.42	150.303	988.725	146.844	464.823	45302	1583.52
DJ-54	2102.03	9.46248e+06	4.96209e+06	1.22817e+09	1.11649e+07	3.61391e+07	5133.77	3.60562e+06	1.37113e+06	3.8269e+06	1.8569e+06	63164.9	52446.5	755295	2.66525e+07	2.87731e+07	10337.8	34309.9	109551	4.36603e+06	4.05005e+06	158460	10930.9	3288.03	5718.58	64526.3	1977.5	1695.04	589.958	3614.85	529386	3022.75	9728.32	25673.4	3300.35	13405.7	2652.05	583.86	2067.19	321.989	1945.38	379.32	1133.36	152.271	1063.83	144.159	470.799	44364.7	1820.73
DJ-55	2042.43	9.8016e+06	4.85363e+06	1.39724e+09	1.18205e+07	3.46674e+07	5327.49	3.40103e+06	1.38988e+06	3.60882e+06	2.12246e+06	72113.3	58681.8	735755	3.12534e+07	3.35168e+07	11868.1	30057.4	38646.1	4.90005e+06	4.72962e+06	186664	12410.4	5276.32	4995.46	59738.1	1758.84	3317.33	661.884	815.874	610470	1467.39	9128.94	24211.2	3172.66	13298.9	2493.44	554.02	2051.84	317.071	1840.16	369.407	1072.97	158.139	986.528	149.479	457.608	46674.7	1639.65
DJ-56	2016.7	9.05179e+06	4.30796e+06	1.24398e+09	1.1383e+07	3.23313e+07	5569.73	3.29188e+06	1.20818e+06	3.53696e+06	2.55898e+06	72763.9	60785.7	680448	3.2423e+07	3.60788e+07	12726	30662.5	40366.2	4.30162e+06	4.02115e+06	188719	12626	3125.38	3968.27	63637.6	1861.36	3073.37	598.26	774.875	491974	1294.12	5953.52	16634.3	2201.96	9263.48	1903.1	434.179	1593.49	247.658	1470.93	301.148	862.648	122.947	873.73	129.371	469.169	43612.7	1354.41
DJ-57	2056.97	1.00348e+07	6.67831e+06	2.0463e+09	1.28725e+07	3.62038e+07	6883.06	3.26152e+06	1.46285e+06	3.53692e+06	1.74774e+06	76714.8	61554.5	741651	3.19172e+07	3.4645e+07	12072.1	31805.9	42836.1	4.68946e+06	4.48114e+06	197229	12564.5	3149.99	4490.1	70325	1694.64	3156.81	641.343	3044.83	514441	3401.16	7048.9	19038.8	2506.66	10683	2116.25	478.852	1740.47	274.986	1617.54	319.09	899.478	129.679	899.45	126.285	481.351	49502.6	1721.46
DJ-58	1906.13	1.063e+07	6.33833e+06	1.99358e+09	1.3101e+07	3.88103e+07	5843.06	3.03127e+06	1.31992e+06	3.22573e+06	1.79518e+06	76468.1	62009.1	783908	4.36515e+07	4.80648e+07	12609.3	31623.6	39006.7	4.10419e+06	3.93313e+06	214808	13018.3	4723.62	4709.95	53971.3	1697.97	2168.84	603.802	593.26	539017	1151.08	9462.62	24037.7	3020.81	12266.6	2442.25	551.844	1944.02	285.505	1667.26	335.461	964.267	133.526	862.587	129.247	455.629	40994.8	1690.89
DJ-59	1869.81	1.70065e+07	1.15911e+07	2.53378e+09	1.41156e+07	5.119e+07	8495.95	3.18716e+06	1.43205e+06	3.42584e+06	5.81106e+06	75402.8	70014.1	802656	3.14382e+07	3.49408e+07	13131.1	36624.3	91103	4.2406e+06	4.00191e+06	256645	13654.6	7709.03	8397.14	65657.6	4900.07	3411.41	777.66	6149.9	602725	5669.43	23905	60287.8	6574.89	25539.8	4299.52	897.985	3398.08	439.142	2624.96	453.25	1342.54	169.355	1146.52	162.333	495.408	53404.9	3690.58
DJ-60	1958.75	1.27116e+07	6.85483e+06	1.51276e+09	1.17183e+07	4.25777e+07	5571.43	3.22459e+06	1.38239e+06	3.49911e+06	6.28314e+06	66448.1	64650.6	815767	2.8554e+07	3.09591e+07	10805.8	33910.1	88351.7	4.07854e+06	3.90021e+06	273566	13877.2	4917.87	5427.03	66237.8	4904.91	1346.07	965.751	6037.58	647988	5492.27	17734.3	48417.3	5520.54	21722.4	3378.85	728.33	2587.77	349.828	1941.09	364.594	1025.43	138.343	952.956	128.629	536.736	61443.3	1843.67
DJ-61	1688.01	1.06411e+07	1.09168e+07	1.95861e+09	1.25031e+07	4.34672e+07	7059.26	2.88603e+06	1.25158e+06	3.25181e+06	3.29451e+06	59540.6	57401.6	714684	2.8345e+07	3.06504e+07	10430.8	31055.5	70170.6	3.63502e+06	3.39137e+06	202340	10721.7	5634.51	6776.01	57857	3673.63	2180.12	777.755	5910.19	559757	5292.37	19994.6	51557	5750.16	22043.8	3625.04	805.016	2828.44	375.965	2058.24	393.643	1118.37	152.028	1035.85	131.015	436.095	50491.9	2888.41
DJ-62	1729.81	1.56869e+07	1.17847e+07	2.56892e+09	1.33399e+07	4.87573e+07	8386.68	3.13117e+06	1.36076e+06	3.4415e+06	4.89853e+06	67695.7	68307.7	740152	3.01947e+07	3.30571e+07	12209.9	34886.7	114274	4.35696e+06	4.1281e+06	299850	12502.8	6541.83	8589.44	68997.2	5432.62	1172.15	833.101	8848.9	638981	8169.95	22394.7	56291.9	6090.41	23500.7	3952.64	877.366	3094.43	423.116	2217.65	413.124	1188.15	159.254	1161.8	146.612	446.008	63838.9	3505.27
DJ-63	1763.37	1.68011e+07	1.117e+07	2.23001e+09	1.21467e+07	4.702e+07	6873.21	3.02565e+06	1.31917e+06	3.3384e+06	1.03841e+07	66310.7	64825.2	828512	2.82761e+07	3.12734e+07	11644	34366.1	101013	4.02339e+06	3.82702e+06	293503	13454.5	6307.51	7663.75	61113.8	5000.98	1069.92	865.803	5436.39	616789	5333.85	22960.9	59217.6	6672.4	25797.5	4159.09	910.718	3236.23	444.632	2353.96	453.171	1225.12	175.869	1123.6	162.25	486.165	58108.2	2233.82
DJ-64	1803.17	1.25792e+07	8.54854e+06	1.76277e+09	1.23493e+07	4.47469e+07	5168.08	3.11411e+06	1.40837e+06	3.33516e+06	4.47213e+06	69798	71831.7	775004	3.03888e+07	3.38027e+07	12334	38081.4	100603	4.14766e+06	3.90822e+06	288671	13351	5369.23	6332.44	61514.3	5571.65	1194.33	883.067	5685.23	656190	5507.73	20385.2	54343.2	6197.64	24006.1	4046.24	879.253	3049.26	423.484	2320.72	447.068	1221.62	173.502	1084	152.484	486.642	60655.6	1434.18
DJ-65	1884.79	1.25165e+07	1.00385e+07	2.40168e+09	1.27175e+07	4.10743e+07	7739.08	3.16781e+06	1.31533e+06	3.4376e+06	6.22341e+06	65880.7	61773.7	808385	2.8025e+07	2.99844e+07	11551.1	34153.9	73791.9	4.0841e+06	3.90675e+06	289287	12062.5	4999.45	7345.96	66018.9	4171.21	1085.18	765.45	5117.61	596590	5378.29	19461.4	50750.6	5662.25	22109.8	3738.29	833.656	2918.85	395.291	2156.12	397.914	1116.37	156.113	1011.2	146.497	481.582	56492.7	2707.83
DJ-66	1798.7	1.37758e+07	9.49584e+06	2.26154e+09	1.24625e+07	4.30204e+07	6832.14	3.20271e+06	1.34363e+06	3.54387e+06	5.81452e+06	65601.9	60849.5	763809	2.69396e+07	2.91157e+07	11267.8	33555.6	70881.8	4.33185e+06	4.03148e+06	243989	16290	4497.5	6486.15	68848.9	4128.09	1320.58	902.152	5320.34	662743	5006.96	17337.3	47796.3	5473.68	21214.6	3571.43	816.176	2820.95	393.207	2128.32	399.379	1136.82	159.593	1012.87	147.926	479.953	56513	2129.06
DJ-67	1683.85	1.32132e+07	1.19671e+07	2.78437e+09	1.27511e+07	4.28335e+07	8279.35	2.96801e+06	1.42422e+06	3.21759e+06	5.38239e+06	65917.4	64373.7	768919	2.84327e+07	3.09086e+07	11209.2	34692.3	85353.9	4.02302e+06	3.85249e+06	237643	12121.9	5703.7	8589.29	83150.3	4444.64	-37.1461	877.54	5683.64	622620	5272.87	24565.8	61758.6	6725.93	25712.8	4123.74	917.707	3497.38	452.841	2443.67	453.637	1290.39	171.33	1209.36	171.363	485.661	55032.8	3811.92
DJ-68	1386.51	1.54313e+07	5.0753e+06	1.71021e+09	1.4572e+07	3.66221e+07	5163.92	2.39323e+06	928407	2.60053e+06	3.24394e+06	54342.9	43524	556936	2.132e+07	2.2862e+07	7278.46	19640.7	33872.5	3.25535e+06	3.04492e+06	116972	6470.55	2848.31	3286.1	47800	1472.36	-195.284	363.257	1556.79	691470	1707.54	7293.67	19294.5	2515.49	10229.5	1868.51	543.473	1508.68	215.848	1236.24	257.076	708.331	102.242	647.48	96.4574	364.962	31851	933.509
DJ-69	1764.86	1.4855e+07	7.463e+06	1.46086e+09	1.13091e+07	4.22073e+07	5399.65	3.16952e+06	1.45633e+06	3.53837e+06	6.62193e+06	64210	62493.1	752443	2.67884e+07	2.945e+07	10290.2	33539	71986.2	4.67975e+06	4.3148e+06	313253	11458.6	4076.86	6271.38	66313.2	3714.66	154.992	906.401	5610.28	583208	6021.45	15535.1	42522.6	4969.88	19805	3377.43	735.294	2727.52	367.455	2073.55	399.258	1096.5	146.619	1123.76	147.218	471.821	57236.1	1693.52
DJ-70	1989.36	1.18443e+07	1.08723e+07	2.4409e+09	1.20204e+07	4.33547e+07	7752.81	3.41366e+06	1.44165e+06	3.69621e+06	5.41187e+06	70106.7	67918.8	844327	2.95273e+07	3.21401e+07	12177	34158.6	76113.5	4.4603e+06	4.19947e+06	238804	13334.4	5215.39	7235.44	67268.3	4897.81	-200.736	1022.92	5642.62	648745	5540.86	19882.9	52766.5	5927.56	22980.2	3846.32	839.181	3007.7	416.814	2245.3	416.128	1201.58	161.086	1131.25	156.638	537.782	62989.5	2564.83
DJ-71	1826.49	1.10703e+07	1.06826e+07	1.79777e+09	1.25561e+07	4.90193e+07	6640.62	3.15733e+06	1.50158e+06	3.44136e+06	4.71136e+06	69759	71121.9	793200	3.08454e+07	3.3897e+07	13063.5	40221.3	98452	4.1746e+06	3.91151e+06	277615	13174.9	6050.86	7092.07	70010.7	5166.63	-1129.04	969.519	5994.05	675311	5734.06	24406.1	62695.6	6907	26197.4	4043.23	874.153	3321.16	417.955	2234.75	410.828	1145.88	153.959	1366.39	143.782	494.452	61115.5	2301.62
DJ-72	1747.7	1.31401e+07	1.21523e+07	3.00026e+09	1.26081e+07	4.22895e+07	8455.32	2.981e+06	1.43017e+06	3.29997e+06	3.93088e+06	60702	57338.6	661852	2.53306e+07	2.79374e+07	9840.44	30429.2	58788.6	4.47025e+06	4.175e+06	226339	10616.2	5357.98	7157.88	65224.1	2808.96	24.8697	735.337	4942.89	610911	5122.75	14740.8	39209.4	4395.96	17499.5	3061.97	717.302	2541.03	355.588	2008.25	390.994	1128.53	153.113	1134.04	151.814	425.298	48947.6	3026.97
DJ-73	1940.51	1.03687e+07	7.07516e+06	1.7962e+09	1.2435e+07	3.68812e+07	4480.82	3.14477e+06	1.06752e+06	3.3398e+06	2.29176e+06	62975.2	51794.5	673207	2.6459e+07	2.9002e+07	9153.59	24386.9	52219.4	3.8476e+06	3.56887e+06	271891	8740.02	3413.9	4310.63	58924.3	1976.18	-4856.95	935.215	3675.07	840653	3194.14	10312.3	26987.5	3307.76	13196	2364.38	563.722	1847.95	269.955	1485	284.206	832.236	119.91	748.484	104.282	572.87	62806	1712.67
DJ-74	1913.68	1.00234e+07	1.24708e+07	3.22012e+09	1.23713e+07	3.71385e+07	10261.8	3.29866e+06	1.38213e+06	3.55871e+06	3.01185e+06	64249.2	57211	700861	2.75065e+07	3.04686e+07	9798.19	28673.7	80096	4.23978e+06	3.937e+06	307323	11027.6	5211.4	10135.7	61518.5	2734.81	3349.51	1165.84	2716.17	729258	2453.01	20892.5	52346.4	5827.88	23099.1	4086.77	982.914	3547.43	499.333	2807.78	495.453	1448.78	205.53	1290.91	186.299	471.072	70344.1	4654.82
DJ-75	1875.57	9.57125e+06	6.90334e+06	1.50822e+09	1.09399e+07	3.77548e+07	5617.56	3.51652e+06	1.32993e+06	3.70645e+06	2.35658e+06	64463.1	60335.4	711161	2.86511e+07	3.1541e+07	10328.3	26826.5	92008.5	4.25205e+06	3.9583e+06	335864	10454.9	3303.73	4610.35	63509	2502.46	-1651.34	1194.63	4266.35	705212	3772.26	10428.5	27741	3581.67	14721.5	2738.06	629.317	2100.5	309.747	1744.24	342.409	964.808	138.658	868.873	129.447	493.225	70191.5	1558.16
DJ-76	1761.87	9.98063e+06	7.25268e+06	1.87466e+09	1.18818e+07	3.47366e+07	6559.12	2.99069e+06	1.19656e+06	3.21715e+06	2.2945e+06	58787.4	57646.7	845498	7.24708e+07	7.91019e+07	10980.5	27152.9	63130	3.90756e+06	3.65271e+06	324796	10250.7	3863.17	4697.44	57375.7	2430.16	-1307.93	932.759	2580.37	804405	2446.64	10558.6	27680.8	3545	14229.2	2611.16	622.434	1973.27	298.104	1658	318.641	909.131	133.079	807.993	121.663	467.115	59554.3	1740.48
DJ-77	1645.53	1.38706e+07	8.29548e+06	1.97294e+09	1.21903e+07	4.4459e+07	6952.91	3.30681e+06	1.09627e+06	3.48872e+06	3.02114e+06	58647.9	60840.8	614017	2.36008e+07	2.57175e+07	10552.6	38794.7	53319.3	4.47302e+06	4.1049e+06	311719	7419.7	4015.81	5795.69	65018.9	3129.36	-717.978	356.462	4517.13	561808	4268.79	11310.8	28396.5	3503.7	14261.4	2652.21	630.453	2196.83	315.646	1892.32	371.482	1062.19	153.409	1035.22	155.197	348.272	42037.2	1924.58
DJ-78空白	0	0	0	0	0	0	0	#REF!	0	0	0	0	0	0	0	0	0	0	0	0	0	0	0	0	0	0	未检出	0	0	0	0	0	0	未检出	0	0	0	0	0	0	0	#REF!	0	0	0	0	0	0	0
DJ-79空白	#REF!	#REF!	#REF!	#REF!	#REF!	#REF!	#REF!	0	#REF!	0	#REF!	#REF!	#REF!	#REF!	0	0	#REF!	#REF!	#REF!	0	0	#REF!	#REF!	0	0	#REF!	未检出	#REF!	#REF!	0	#REF!	0	0	未检出	0	0	0	0	#REF!	0	0	未检出	0	#REF!	0	0	0	#REF!	#REF!
DJ-80GSS	1381.94	1.55403e+07	3.15912e+06	5.59296e+09	2.09057e+07	1.12333e+07	10356.4	1.77394e+06	285213	1.8679e+06	93597.2	25223.7	17491.8	292357	1.06441e+07	1.0473e+07	3703.78	8744.59	7996.35	2.0836e+06	1.96783e+06	25207.7	4071.15	5513.9	8513.84	28223.7	未检出	-6406.05	34.139	-3230.57	1.16646e+06	-2016.09	17171	33577.9	3945.99	14796.5	2752.28	700.599	2392.66	340.935	1836.49	352.262	1040.44	159.693	991.971	136.202	273.16	25806.4	4561.91
[truncated: 1 more columns]
